# Supplementary material
Source: MDPI journal article supplement (https://www.mdpi.com/2073-4468/7/4/37)
Supplement: s1 [file s1]

# Supplementary: A Novel Panel of Rabbit Monoclonal Antibodies and Their Diverse Applications Including Inhibition of *Clostridium perfringens* Epsilon Toxin Oligomerization

Jennifer R Linden <sup>1</sup>, Kiel Telesford <sup>1</sup>, Samantha Shetty <sup>1</sup>, Paige Winokour <sup>1,2</sup>, Sylvia Haigh <sup>1</sup>, Ellen Cahir-McFarland <sup>3</sup>, Giovanna Antognetti <sup>3</sup>, Abhishek Datta <sup>3</sup>, Tao Wang <sup>3</sup>, Werner Meier <sup>3</sup> and Timothy Vartanian <sup>1,\*</sup>

<sup>1</sup> Brain and Mind Research Institute, Weill Cornell Medical College of Cornell University, New York, NY, 10065, USA; jel2049@med.cornell.edu (J.R.L.); kit2003@med.cornell.edu (K.T.); [samanthashetty25@gmail.com](mailto:samanthashetty25@gmail.com) (S.S.); pwinokur@mail.rockefeller.edu (P.W.); sylviahaigh@gmail.com (S.H.)

<sup>2</sup> Rockefeller University, New York, NY, USA, 10065

<sup>3</sup> Biogen, Cambridge, MA, 02142, USA; ellen.cahir-mcfarland@biogen.com (E.C.-M.); giovanna.antognetti@biogen.com (G.A.); dradatta2004@gmail.com (A.D.); wt76610@gmail.com (T.W.); werner.meier@biogenidec.com (W.M.)

\* Correspondence: [tiv2002@med.cornell.edu](mailto:tiv2002@med.cornell.edu)

Received: 28 August 2018; Accepted: 22 October 2018; Published: 25 October 2018

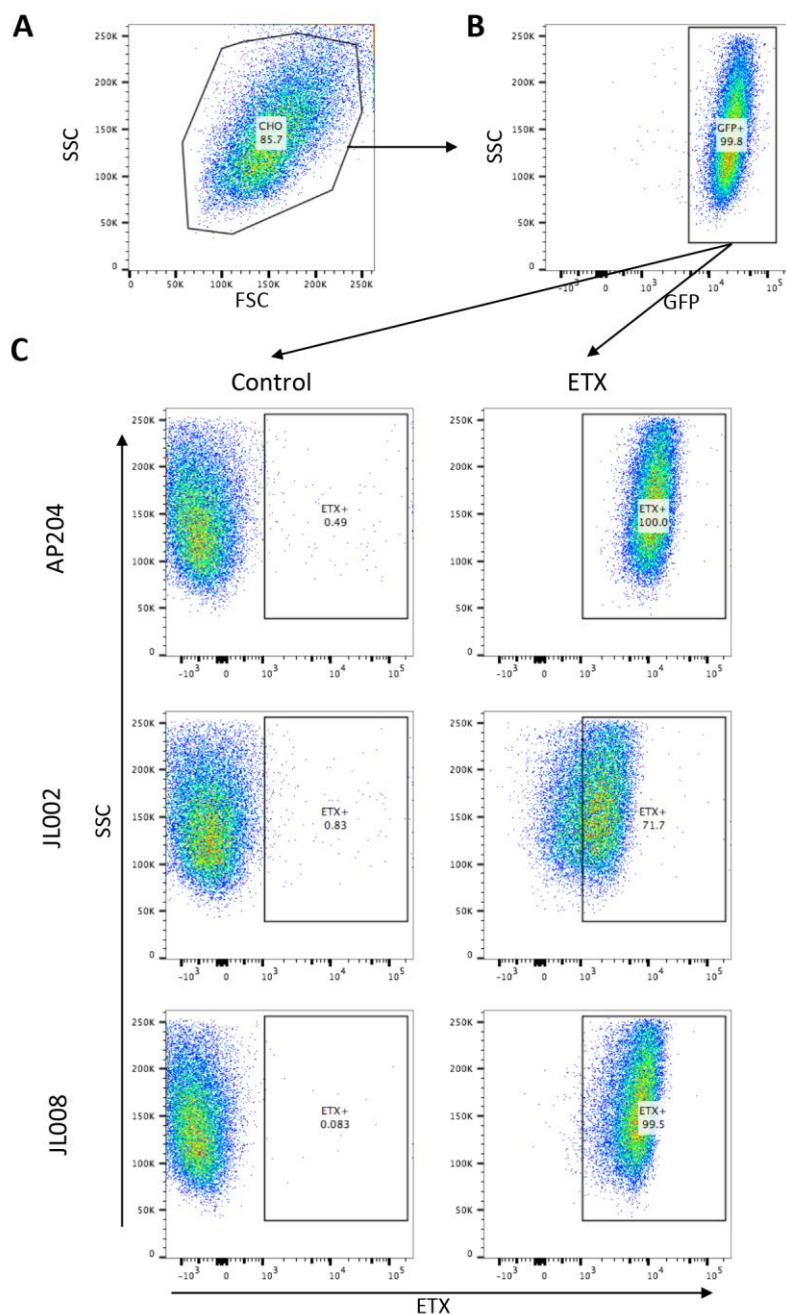

**Supplemental Figure 1. Gating strategy for detection of ETX on rMAL-CHO cells via flow cytometry.** rMAL-CHO cells were treated with (ETX) or without ETX (CT) for 1 hour. Cells were trypsinized, fixed, blocked then probed with antibodies at XXX for 30 minutes. Antibody binding was detected using an PE conjugated anti-rabbit antibody. **(A)** CHO cells were gated on based on the forward and side scatter. **(B)** rMAL-GFP expressing cells were gated on based on GFP fluorescence. **(C)** Example of anti-ETX antibody detection on control treated cells or ETX treated cells when probed with affinity purified anti-ETX polyclonal antibody (AP204), JL002, and JL008. Representative examples of experimental triplicates. Note, dot blots for JL008 are the same displayed in Figure 6B.

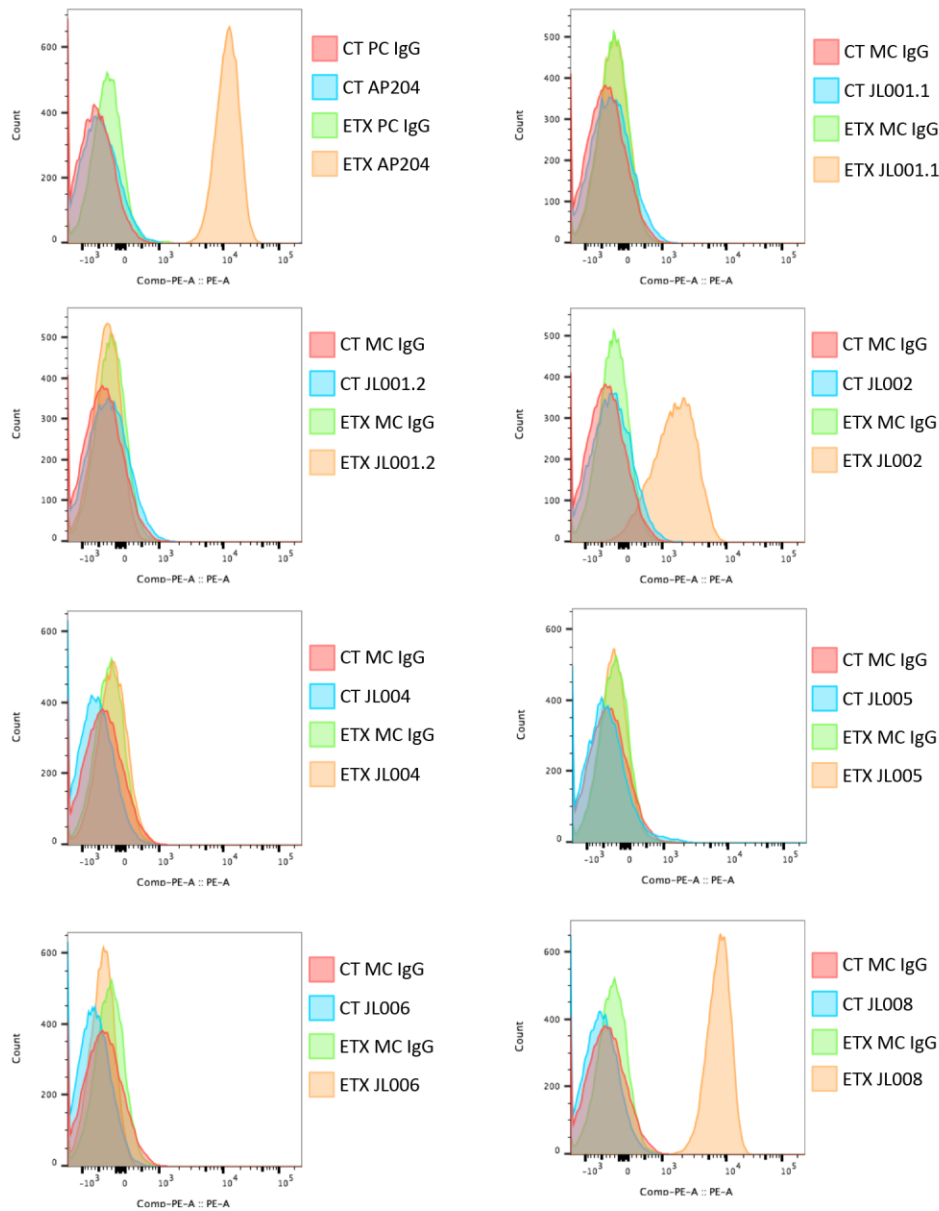

**Supplemental Figure 2. Representative flow cytometry histograms for ETX detection with additional controls.** Histograms of ETX fluorescence for control treated (CT) and ETX treated (ETX) rMAL-CHO cells when probed with individual anti-ETX monoclonal antibodies or AP204 polyclonal antibody. As additional controls, CT and ETX treated cells were also probed with appropriate isotype controls, a polyclonal IgG (PC IgG) for AP204 and a monoclonal IgG (MC IgG) for JL antibodies.
